# Supplementary material for: Replication Protein A Availability during DNA Replication Stress Is a Major Determinant of Cisplatin Resistance in Ovarian Cancer Cells
Source: Oxford University Press journal article supplement (doi:10.1158/0008-5472.can-18-0618), 2018-08-02
Supplement: 00085472can180618-sup-197630_2_supp_4915244_pcdrqn.xlsx [file 00085472can180618-sup-197630_2_supp_4915244_pcdrqn.xlsx]

## Sheet: Feuil1
Supplementary Table S2
LD50 of different agents compared to NER efficiency
			NER	CDDP	MMC	UV	IR	Campto.	HU
		SPR	% 6-4PP at 6h	LD50 (μM)	LD50 (nM)	LD50 (J/m²)	LD50 (Gy)	LD50 (nM)	LD50 (μM)
HGSOC	TOV2223G	+	7 +/- 3	6.7 +/- 0.2	350 +/- 50	5.0 +/- 0.01	1.1 +/- 0.1	419 +/- 68	90 +/- 9
	OV866(2)	+	11.5 +/- 0.3	7 +/- 0.9	400 +/- 40	8 +/- 1	1.04 +/- 0.06	210 +/- 37	164 +/- 17
	OV1369(R2)	+	20 +/- 10	7.5 +/- 0.5	700 +/- 50	7.5 +/- 0.6	1.8 +/- 0.1	697 +/- 66	145 +/- 9
	OV90	-	50 +/- 3	4.1 +/- 0.4	490 +/- 40	4.0 +/- 0.4	1.21 +/- 0.09	314 +/- 44	140 +/- 40
	OV3331	-	70 +/- 2	2.6 +/- 0.2	120 +/- 40	2.8 +/- 0.6	1.4 +/- 0.2	95 +/- 18	ND
	OV1946	-	72 +/- 4	0.25 +/- 0.08	61 +/- 2	3 +/- 1	0.95 +/- 0.06	35 +/- 9	70 +/- 1
	TOV2835EP	-	88 +/- 6	0.9 +/- 0.1	100 +/-30	3.9 +/- 0.5	1.7 +/- 0.2	54 +/- 7	76 +/- 1
	TOV3041G	-	90 +/- 3	0.083 +/- 0.007	26 +/- 8	2.0 +/- 0.4	0.66 +/- 0.04	27 +/- 3	81 +/- 9
non-	TOV112D	+	13 +/- 9	9.0 +/- 0.7	250 +/- 20	4.5 +/- 0.1	ND	ND	150 +/- 10
HGSOC	TOV21G	-	84 +/- 8	0.049 +/- 0.006	16 +/- 2	1.0 +/- 0.3	ND	ND	78 +/- 9
Values are the means +/- SEM of three independent experiments. LD50 were calculated from clonogenic survival assays using GraphPad Prism (see text for details)
